# Supplementary material for: Is Maternal Influenza or Fever During Pregnancy Associated with Autism or Developmental Delays? Results from the CHARGE (CHildhood Autism Risks from Genetics and Environment) Study
Source: Springer Nature journal article supplement (doi:10.1007/s10803-012-1540-x), 2012-05-05
Supplement: MOESM1 [file 10803_2012_1540_MOESM1_ESM.doc]

Appendix 1: Extract of Relevant Questions for Study of Flu and Fever from the CHARGE Study Environmental Exposure Questionnaire. CHARGE Study, California, 2003-2010

**Subject ID # ___________**

**Part 7: Maternal Illnesses, Medications and Procedures during Pregnancy**

Now I am going to ask you about illnesses and procedures you may have had during the index time considered in your calendar, which includes 3 months before you became pregnant with [CHILD] to date of [CHILD]’s birth. Please refer to your calendar.

| 21. a. During the index time [and through the end of breast feeding], did you have any of the following? | | b. **For each ‘yes’ response to (a):** During which months [including breastfeeding] did you have (CONDITION)? |
| --- | --- | --- |
| Flu | Y N RF DK | -3 -2 -1 1 2 3 4 5 6 7 8 9 BF RF DK |
| Other respiratory infection (specify):____________ | Y N RF DK | -3 -2 -1 1 2 3 4 5 6 7 8 9 BF RF DK |
| Urinary tract infection | Y N RF DK | -3 -2 -1 1 2 3 4 5 6 7 8 9 BF RF DK |
| Other infection (specify):____________ | Y N RF DK | -3 -2 -1 1 2 3 4 5 6 7 8 9 BF RF DK |

22. Did you have a fever when you had (CONDITION)?

- **YES**
- **NO**
- **RF**
- **DK**
  1. Did you take any medicine when you had (CONDITION)?
- **YES**
- **NO**
- **RF  Go to 26**
- **DK**
  1. What medicine did you take for (CONDITION), and during which months of the index time did you take it?

__________________________**-3 -2 -1 1 2 3 4 5 6 7 8 9 BF RF DK**

25. How often did you use (NAME OF MEDICATION), and how many capsules/tablets/applications did you take/have at each dose?

____tablets/capsules/applications per day – for _______ days

____ tablets/capsules/applications per week

____tablets/capsules/applications per month

**RF**

**DK**

1. Not counting the fevers with the illnesses we may have already asked about, did you have any (other) fevers during the index time [and through the end of breast feeding]?

- **YES**
- **NO**
- **RF**
- **DK**
  1. What was the cause of the fever, and during which months [including breastfeeding] did you have it?

__________________________**-3 -2 -1 1 2 3 4 5 6 7 8 9 BF RF DK**

28. Did you take any medicine when you had (FEVER/ CONDITION)?

- **YES**
- **NO**
- **RF**
- **DK**

29. What medicine did you take for (FEVER/CONDITION), and during which months [including breastfeeding] did you take it?

__________________________**-3 -2 -1 1 2 3 4 5 6 7 8 9 BF RF DK**

30. How often did you use (NAME OF MEDICATION), and how many capsules/tablets did you take at each dose?

- ____tablets/capsules per day – for _______ days
- ____ tablets/capsules per week
- ____tablets/capsules per month
- **RF**
- **DK**
